# Supplementary material
Source: publisher figshare collection journal article supplement (https://gsajournals.figshare.com/ndownloader/files/16574225)
Supplement: Supplementary file 1 [file 16574225]

## Sheet: Sheet4
				A. bisporus			White rot						Brown rot		Straw rot														Ascomycetes
Class	Enzyme	EC	CAZy	ARP23	H97	JB137	L.edoB17	L.edo	S.com	G.luc	P.chr	P.ost	P.pla	S.lac	C.cin	V.vol	A.sub	G.fro	H.mar	C.put	C.neo	D.squ	G.tra	G.lux	L.bic	M.ror	T.ver	U.may	S.nod	A.nig	T.ree	C.par	N.cra	P.sti	S.cer
Cellulase	Endo-beta-1,4-glucanase	EC:3.2.1.4	GH5|GH7|GH9|GH12|GH44|GH45|AA9	37	32	35	40	42	42	42	39	71	41	26	68	62	67	37	50	12	12	41	26	52	27	32	51	16	59	24	15	37	28	7	5
	1,4-β-cellobiosidase	EC:3.2.1.91	GH6|GH7	1	1	1	5	5	3	4	6	17	0	1	11	15	7	4	5	0	0	4	0	8	0	4	5	0	9	4	2	7	8	0	0
	β-glucosidase	EC:3.2.1.21	GH1|GH3	10	8	9	13	14	15	16	12	15	13	12	9	14	14	9	13	7	7	11	13	18	2	11	14	3	17	20	15	19	11	8	0
	Total			48	41	45	58	61	60	62	57	103	54	39	88	91	88	50	68	19	19	56	39	78	29	47	70	19	85	48	32	63	47	15	5
Hemicellulase	Endo-1,4-beta-xylanase	EC:3.2.1.8	GH10|GH11	3	1	4	4	4	6	8	6	5	3	1	12	14	6	4	5	0	0	4	3	7	0	6	6	3	14	5	4	8	6	1	0
	β-xylosidase	EC:3.2.1.37	GH3|GH39,GH43	9	7	8	11	12	12	13	10	12	9	10	7	11	13	7	10	7	7	8	10	15	2	9	12	3	15	17	13	16	9	8	0
	α-glucuronidase	EC:3.2.1.131	GH67	0	0	0	0	0	0	0	0	0	0	0	0	0	0	0	0	0	0	0	0	0	0	0	0	0	1	1	1	1	1	0	0
	acetylxylan esterase	EC:3.1.1.72	CE1|CE5	5	5	8	1	2	10	2	3	3	0	1	11	6	8	1	2	2	2	1	3	9	2	1	1	6	22	9	7	17	10	1	1
	feruloyl esterase	EC:3.1.1.73	CE1	1	1	2	1	2	9	2	3	3	0	1	5	5	5	1	2	2	2	1	3	6	1	0	1	2	11	4	3	3	7	1	1
	α-L-arabinofuranosidases	EC:3.2.1.55	GH51|GH54|GH62	1	1	1	2	3	3	2	1	4	2	1	4	3	2	2	3	1	1	2	3	6	0	0	2	3	6	4	3	3	2	0	0
	Total			19	15	23	19	23	40	27	23	27	14	14	39	39	34	15	22	12	12	16	22	43	5	16	22	17	69	40	31	48	35	11	2
Pectinase	pectin lyase	EC:4.2.2.10	PL1	2	1	2	3	3	5	0	0	9	0	0	1	11	2	0	4	0	0	0	0	3	0	8	0	1	4	6	0	5	1	0	0
	pectate lyase	EC:4.2.2.2	PL1|PL3|PL9	3	2	3	3	3	10	0	0	12	0	0	3	15	3	0	8	0	0	0	0	4	0	10	0	1	6	6	0	6	2	0	0
	pectinesterase	EC:3.1.1.11	CE8	2	2	2	2	3	2	2	1	2	3	2	0	3	3	2	3	0	0	3	2	6	4	2	2	1	3	3	0	5	2	0	0
	polygalacturonase	EC:3.2.1.15	GH28	5	5	5	11	13	3	10	4	6	11	7	3	3	13	5	6	1	1	7	10	19	6	2	9	1	4	20	4	21	2	0	1
	Total			12	10	12	19	22	20	12	5	29	14	9	7	32	21	7	21	1	1	10	12	32	10	22	11	4	17	35	4	37	7	0	1
Lignin Oxidase	multicopper oxidase	EC:1.10.3.2	AA1	13	12	13	12	12	2	16	3	12	5	6	17	11	7	10	20	3	3	12	5	18	14	12	10	2	5	10	3	12	10	2	2
	Peroxidase	EC:1.11.1.1-	AA2	4	4	5	9	11	2	11	17	10	3	1	4	9	23	17	6	2	2	14	1	14	3	4	27	2	9	2	5	4	5	2	1
	Total			17	16	18	21	23	4	27	20	22	8	7	21	20	30	27	26	5	5	26	6	32	17	16	37	4	14	12	8	16	15	4	3
Auxillary Enzymes	aryl-alcohol/glucose oxidase	EC:1.1.3.7/4	AA3_2a/AA3_2b	30	31	26	18	18	16	23	6	36	21	8	26	25	30	13	42	2	2	28	18	55	7	19	16	7	17	19	7	10	1	0	0
	alcohol oxidase	EC:1.1.3.13	AA3_3	9	9	5	3	6	4	5	3	4	8	5	2	5	6	3	2	0	0	4	2	9	2	0	4	0	3	2	2	2	1	0	0
	Pyranose oxidase	EC:1.1.3.10	AA3_4	0	0	0	1	1	1	0	1	0	0	0	0	0	3	1	0	0	0	0	1	0	0	0	1	0	0	0	0	0	0	0	0
	vanillyl-alcohol oxidase	EC:1.1.3.38	AA4	1	2	1	1	3	2	1	1	1	3	2	0	2	1	1	1	1	1	3	3	2	0	0	3	1	3	4	2	4	2	3	3
	Glyoxal oxidase	EC:1.1.3.-	AA5_1	9	9	8	4	4	2	8	4	12	3	2	5	3	7	5	4	3	3	8	2	9	8	0	8	1	1	0	0	0	0	0	0
	Galactose oxidase	EC:1.1.3.9	AA5_2	0	0	0	0	0	0	0	0	0	0	0	0	0	0	0	0	0	0	0	0	0	0	0	0	1	3	0	0	0	1	0	0
	Benzoquinone reductase	EC:1.6.5.6	AA6	4	3	4	2	2	4	2	4	2	2	2	3	2	4	1	1	2	2	1	3	2	2	1	1	1	1	2	1	1	1	4	3
	Total			53	54	44	29	34	29	39	19	55	37	19	36	37	51	24	50	8	8	44	29	77	19	20	33	11	28	27	12	17	6	7	6
Total				149	136	142	146	163	153	167	124	236	127	88	191	219	224	123	187	45	45	152	108	262	80	121	173	55	213	162	87	181	110	37	17
Species names highlighted in Brown are edible mushrooms. Totals shown for each class of gene as well as grand totals
